# Supplementary material
Source: Springer Nature journal article supplement (https://www.springermedizin.de/resource/supplementary/12865_2008_234_MOESM2_ESM.pdf/9427568)

**A.**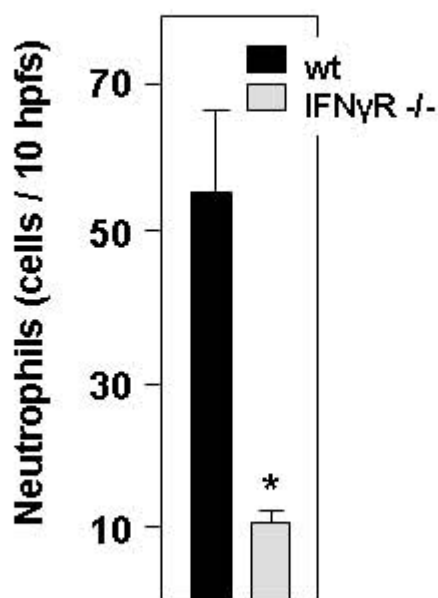**B.**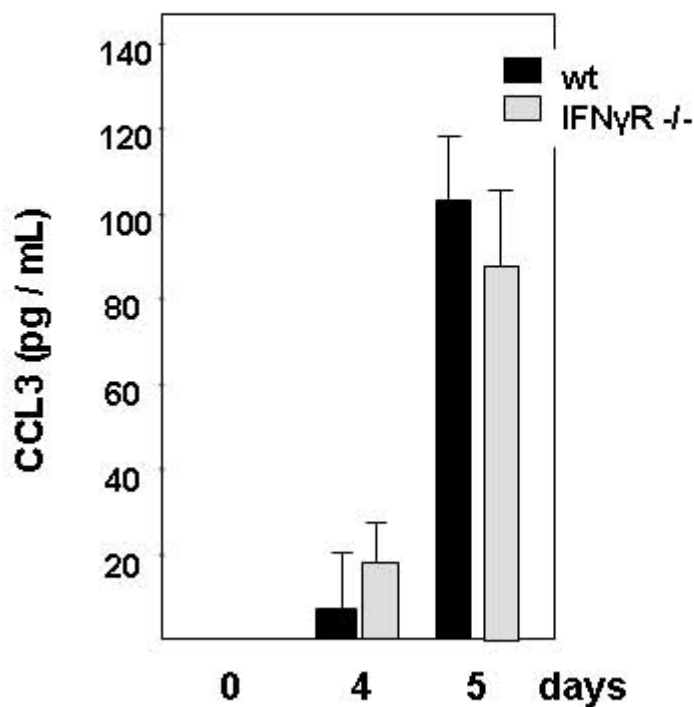**C.**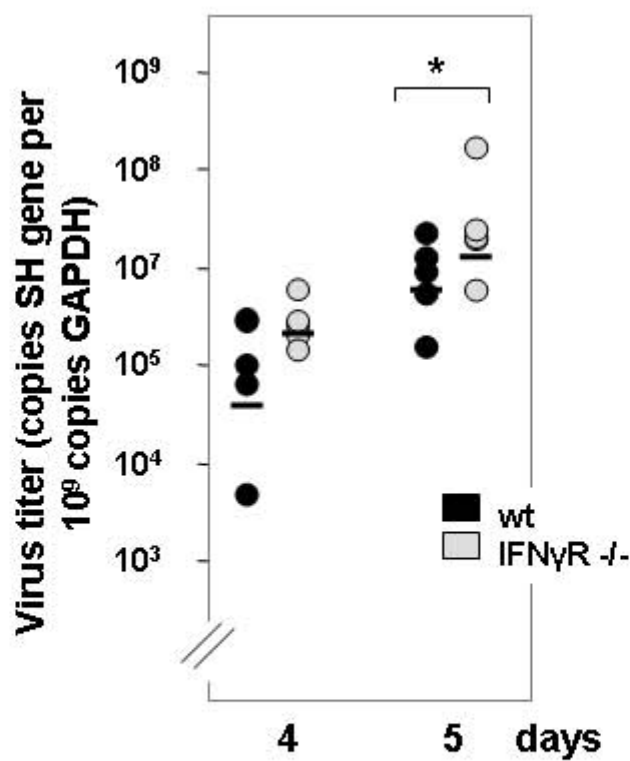

Supplement: MOESM2 [file 9427568]
